# Supplementary material
Source: Royal Society of Chemistry journal article supplement (doi:10.1039/d6ce00306k)
Supplement: d6ce00306k1.pdf [file d6ce00306k1.pdf]

## Supporting information

### **Non-linear optical-dielectric duple switch and narrow band gap in a one-dimensional hybrid compound: $[(\text{CH}_3)_2\text{S}(\text{CH}_2)_3\text{NH}_3][\text{SbBr}_5]$**

Peng-Peng Gong, Qian-Jun Gu, Ya-Juan Li, Yi Guo, Wan-Yu Zhu and Bo Huang\*

Yunnan Key Laboratory of Modern Separation Analysis and Substance Transformation, College of Chemistry and Chemical Engineering, Yunnan Normal University, Kunming 650500, China.

### Contents

|                                                                    |    |
|--------------------------------------------------------------------|----|
| 1. Ultraviolet-vis spectrum .....                                  | S2 |
| 2. Calculation of Band Structure.....                              | S2 |
| 3. Table S1. Crystallographic data and structural refinements..... | S3 |
| 4. Table S2. Selected bond lengths.....                            | S3 |
| 5. Table S3. Selected bond angles .....                            | S4 |
| 6. Table S4. The geometry of hydrogen bonds .....                  | S5 |
| 7. Figure S1. Infrared spectra .....                               | S5 |
| 8. Figure S2. Powder X-ray diffractions .....                      | S6 |
| 9. Figure S3. Thermogravimetric curve.....                         | S6 |
| 10. Figure S4. The packing diagrams .....                          | S6 |
| 11. Figure S5. Imaginary part of the dielectric permittivity.....  | S7 |
| 12. Figure S6. Pyroelectric measurements .....                     | S7 |

**Ultraviolet-vis spectrum.** The generated reflectance-versus-wavelength data were used to estimate the band gap of the material by converting reflectance data to absorbance according to the Kubelka-Munk function:

$$F(R_{\infty}) = (1 - R_{\infty})^2 / 2R_{\infty}$$

The optical band gap can be determined by the variant of Tauc equation:

$$(h\nu \cdot F(R_{\infty}))^{1/n} = A(h\nu - E_g)$$

where  $h$  is Planck's constant,  $\nu$  is the vibrational frequency,  $F(R_{\infty})$  is the Kubelka-Munk equation,  $E_g$  is the band gap, and  $A$  is a material-dependent proportionality constant. The value of the exponent  $n$  denotes the nature of the sample transition. For direct allowed transition,  $n = 1/2$ ; for indirect allowed transition,  $n = 2$ . Hence, the optical band gap  $E_g$  can be obtained from a Tauc plot by plotting  $(h\nu \cdot F(R_{\infty}))^{1/n}$  against the energy in eV and extrapolation of the linear region to the X-axis intercept.

**Calculation of Band Structure.** We perform first-principles calculations based on density functional theory (DFT) as implemented in the PWmat package with GPU acceleration.<sup>1-3</sup> The exchange-correlation potential is treated within the generalized gradient approximation (GGA) using the Perdew–Burke–Ernzerhof (PBE) function,<sup>4,5</sup> which is employed for both geometry optimization and band structure calculations. Geometry optimization is carried out with a force convergence criterion of 0.02 eV/Å for the maximum residual force. A Monkhorst–Pack k-point mesh of 1×2×2 is used for geometry optimization, while a denser mesh of 3×6×4 is adopted for self-consistent field and density of states calculations. The self-consistent calculations are converged with an energy threshold of 10<sup>-6</sup> eV. Norm-conserving pseudopotentials are applied with a cutoff energy of 70 Rydberg for geometry optimization and 60 Rydberg for band structure and density of states calculations.<sup>6</sup>

**Table S1.** Summary of crystal data and structural refinements of **1** at 100 and 303 K.

|                                                                                                   |                                                                                                         |                |
|---------------------------------------------------------------------------------------------------|---------------------------------------------------------------------------------------------------------|----------------|
| Empirical formula                                                                                 | [(CH <sub>3</sub> ) <sub>2</sub> S(CH <sub>2</sub> ) <sub>3</sub> NH <sub>3</sub> ][SbBr <sub>5</sub> ] |                |
| Formula weight                                                                                    | 642.54                                                                                                  |                |
| Phase type                                                                                        | LTP                                                                                                     | HTP            |
| <i>T</i> / K                                                                                      | 100(2)                                                                                                  | 303(2)         |
| Space group                                                                                       | <i>Pca</i> 2 <sub>1</sub>                                                                               | <i>Pcmn</i>    |
| <i>a</i> / Å                                                                                      | 25.1840(6)                                                                                              | 12.7383(6)     |
| <i>b</i> / Å                                                                                      | 8.0686(2)                                                                                               | 8.1702(4)      |
| <i>c</i> / Å                                                                                      | 15.1437(4)                                                                                              | 15.2713(8)     |
| <i>V</i> / Å <sup>3</sup>                                                                         | 3077.2(1)                                                                                               | 1589.4(1)      |
| <i>Z</i>                                                                                          | 4                                                                                                       | 2              |
| <i>D</i> <sub>calcd</sub> / g cm <sup>-3</sup>                                                    | 2.774                                                                                                   | 2.685          |
| $\mu$ / mm <sup>-1</sup>                                                                          | 14.881                                                                                                  | 14.405         |
| GOF                                                                                               | 1.006                                                                                                   | 1.116          |
| <i>R</i> <sub>1</sub> , <i>wR</i> <sub>2</sub> [ <i>I</i> > 2 $\sigma$ ( <i>I</i> )] <sup>a</sup> | 0.0241, 0.0448                                                                                          | 0.0442, 0.0909 |
| <i>R</i> <sub>1</sub> , <i>wR</i> <sub>2</sub> (all data)                                         | 0.0276, 0.0456                                                                                          | 0.0967, 0.1052 |
| Flack parameter                                                                                   | 0.497(9)                                                                                                | –              |
| CCDC No.                                                                                          | 2526236                                                                                                 | 2526235        |

$$^a R_1 = F_o - F_c / F_o, wR_2 = \{w[(F_o)^2 - (F_c)^2]^2 / w[(F_o)^2]^2\}^{1/2}$$

**Table S2.** The selected bond lengths (Å) of **1** at 100 and 303 K.

|       |                      |           |                      |           |
|-------|----------------------|-----------|----------------------|-----------|
| 100 K | Sb1–Br1              | 2.6484(9) | Sb1–Br2              | 2.8084(9) |
|       | Sb1–Br3              | 2.7109(8) | Sb1–Br4              | 2.8015(9) |
|       | Sb1–Br5              | 2.9166(9) | Sb1–Br6              | 2.9778(9) |
|       | Sb2–Br6              | 3.0378(8) | Sb2–Br7              | 2.9165(9) |
|       | Sb2–Br8              | 2.6872(9) | Sb2–Br9              | 2.6006(8) |
|       | Sb2–Br10             | 2.6435(8) |                      |           |
| 303 K | Sb1–Br1              | 3.0292(4) | Sb1–Br1 <sup>1</sup> | 3.0292(4) |
|       | Sb1–Br2              | 2.867(1)  | Sb1–Br3              | 2.6489(7) |
|       | Sb1–Br3 <sup>2</sup> | 2.6489(7) | Sb1–Br4              | 2.728(1)  |

Symmetry code: <sup>1</sup>-1-x, 1/2+y, 1-z; <sup>2</sup>+x, 3/2-y, +z

**Table S3.** The selected bond angles (°) of **1** at 100 and 303 K.

|                                                 |                       |                                   |                                   |                      |
|-------------------------------------------------|-----------------------|-----------------------------------|-----------------------------------|----------------------|
| 100 K                                           | $\angle$ Br1–Sb1–Br2  | 90.01(3)                          | $\angle$ Br1–Sb1–Br3              | 93.53(3)             |
|                                                 | $\angle$ Br1–Sb1–Br4  | 91.87(3)                          | $\angle$ Br1–Sb1–Br5              | 90.97(3)             |
|                                                 | $\angle$ Br1–Sb1–Br6  | 177.85(3)                         | $\angle$ Br2–Sb1–Br5              | 92.64(2)             |
|                                                 | $\angle$ Br2–Sb1–Br6  | 91.16(2)                          | $\angle$ Br3–Sb1–Br2              | 89.11(3)             |
|                                                 | $\angle$ Br3–Sb1–Br4  | 90.54(3)                          | $\angle$ Br3–Sb1–Br5              | 175.18(3)            |
|                                                 | $\angle$ Br3–Sb1–Br6  | 88.29(2)                          | $\angle$ Br4–Sb1–Br2              | 178.10(3)            |
|                                                 | $\angle$ Br4–Sb1–Br5  | 87.57(3)                          | $\angle$ Br4–Sb1–Br6              | 86.97(2)             |
|                                                 | $\angle$ Br5–Sb1–Br6  | 87.18(3)                          | $\angle$ Br7–Sb2–Br6              | 90.61(2)             |
|                                                 | $\angle$ Br8–Sb2–Br6  | 87.25(2)                          | $\angle$ Br8–Sb2–Br7              | 175.88(3)            |
|                                                 | $\angle$ Br9–Sb2–Br6  | 90.84(2)                          | $\angle$ Br9–Sb2–Br7              | 90.34(3)             |
|                                                 | $\angle$ Br9–Sb2–Br8  | 93.22(3)                          | $\angle$ Br9–Sb2–Br10             | 92.43(3)             |
|                                                 | $\angle$ Br10–Sb2–Br6 | 176.50(3)                         | $\angle$ Br10–Sb2–Br7             | 90.60(3)             |
|                                                 | $\angle$ Br10–Sb2–Br8 | 91.34(3)                          | $\angle$ Sb1–Br6–Sb2              | 164.07(3)            |
|                                                 | 303 K                 | $\angle$ Br1–Sb1–Br1 <sup>1</sup> | 84.80(1)                          | $\angle$ Br1–Sb1–Br2 |
| $\angle$ Br1 <sup>1</sup> –Sb1–Br2              |                       | 89.57(2)                          | $\angle$ Br1–Sb1–Br3              | 175.93(2)            |
| $\angle$ Br1 <sup>1</sup> –Sb1–Br3              |                       | 91.26(2)                          | $\angle$ Br1–Sb1–Br3 <sup>2</sup> | 91.26(2)             |
| $\angle$ Br1 <sup>1</sup> –Sb1–Br3 <sup>2</sup> |                       | 175.93(2)                         | $\angle$ Br1–Sb1–Br4              | 89.28(2)             |
| $\angle$ Br1 <sup>1</sup> –Sb1–Br4              |                       | 89.28(2)                          | $\angle$ Br2–Sb1–Br3              | 89.36(3)             |
| $\angle$ Br2–Sb1–Br3 <sup>2</sup>               |                       | 89.36(3)                          | $\angle$ Br2–Sb1–Br4              | 178.44(4)            |
| $\angle$ Br3–Sb1–Br3 <sup>2</sup>               |                       | 92.65(4)                          | $\angle$ Br3–Sb1–Br4              | 91.72(3)             |
| $\angle$ Br3 <sup>2</sup> –Sb1–Br4              |                       | 91.72(3)                          | $\angle$ Sb1–Br1–Sb1 <sup>3</sup> | 180                  |

Symmetry code: <sup>1</sup>-1-x, 1/2+y, 1-z; <sup>2</sup>+x, 3/2-y, +z; <sup>3</sup>-1-x, 1-y, 1-z



**Table S4.** The geometry (Å, °) of hydrogen bonds for **1** at 100 K and 303 K.

|       | D-H...A                   | D-H   | H...A | D...A | ∠D-H...A |
|-------|---------------------------|-------|-------|-------|----------|
| 100 K | N1-H1A...Br4              | 0.910 | 2.740 | 3.396 | 129.85   |
|       | N1-H1A...Br6              | 0.910 | 2.858 | 3.569 | 136.06   |
|       | N1-H1B...Br1 <sup>1</sup> | 0.910 | 2.741 | 3.463 | 137.05   |
|       | N1-H1B...Br3 <sup>1</sup> | 0.910 | 2.759 | 3.411 | 129.53   |
|       | N1-H1C...Br8 <sup>2</sup> | 0.910 | 2.659 | 3.540 | 163.22   |
|       | N2-H2C...Br2 <sup>3</sup> | 0.910 | 2.480 | 3.368 | 165.14   |
|       | N2-H2D...Br3 <sup>3</sup> | 0.910 | 2.949 | 3.594 | 129.24   |
|       | N2-H2D...Br5 <sup>4</sup> | 0.910 | 2.973 | 3.466 | 115.70   |
|       | N2-H2D...Br6 <sup>3</sup> | 0.910 | 2.994 | 3.416 | 110.10   |
|       | N2-H2E...Br7 <sup>3</sup> | 0.910 | 2.482 | 3.387 | 172.64   |
| 303 K | N1-H1A...Br3 <sup>5</sup> | 0.890 | 2.509 | 3.397 | 176.21   |
|       | N1-H1B...Br2              | 0.890 | 2.605 | 3.353 | 142.28   |
|       | N1-H1C...Br1              | 0.890 | 2.599 | 3.371 | 145.60   |

Symmetry code: <sup>1</sup>-x+1, -y+1, z+1/2; <sup>2</sup>x, y-1, z; <sup>3</sup>x, y-1, z+1; <sup>4</sup>x, y, z+1; <sup>5</sup>-x-3/2, -y+3/2, z-1/2;

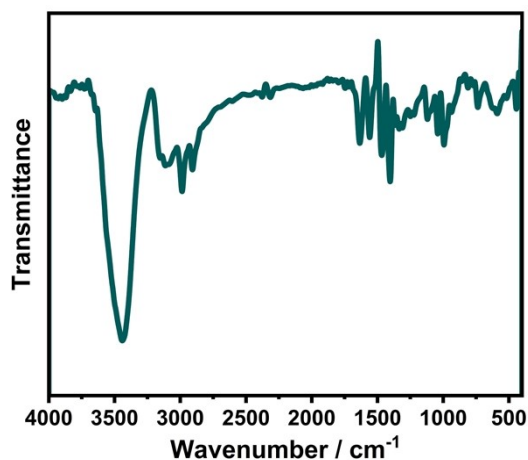

**Fig. S1** Infrared spectrum of **1**. The peaks observed at 3441 cm<sup>-1</sup>, 3113 cm<sup>-1</sup>, and 1119 cm<sup>-1</sup> could be attributed to the stretching vibrations of N-H, C-H, and C-N, respectively. The peaks observed at 1634 cm<sup>-1</sup>, 1467 cm<sup>-1</sup>, and 1403 cm<sup>-1</sup> could be assigned to the bending vibration of N-H, -CH<sub>3</sub>, and -S(CH<sub>3</sub>)<sub>2</sub>, respectively. The peaks observed at 736 cm<sup>-1</sup> could be attributed to the stretching vibrations of C-S.

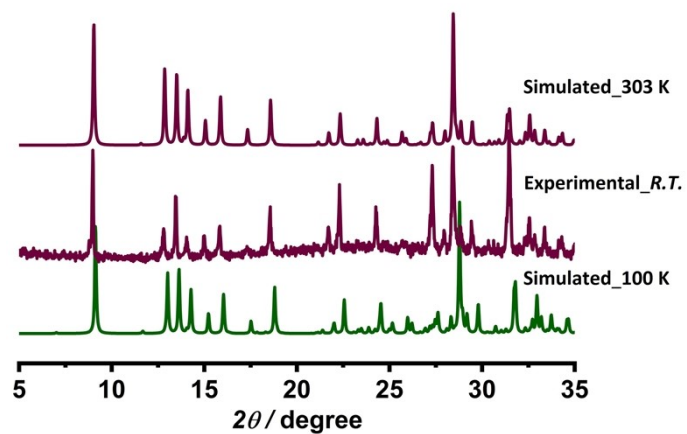

**Fig. S2** The simulated (100 and 303 K) and experimental powder XRD patterns of **1**.

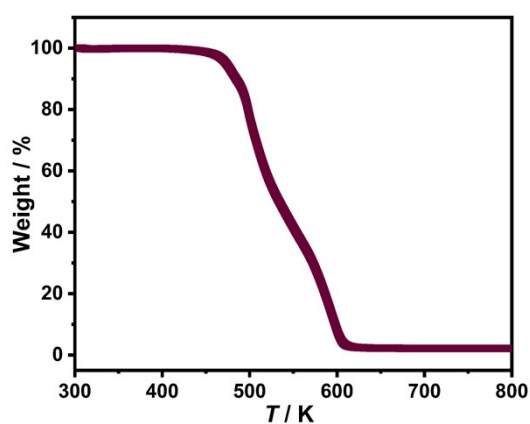

**Fig. S3** Thermogravimetric curve measured at a rate of  $5 \text{ K min}^{-1}$  under  $\text{N}_2$  atmosphere of **1**. It reveals that compound **1** was stable up to about 430 K.

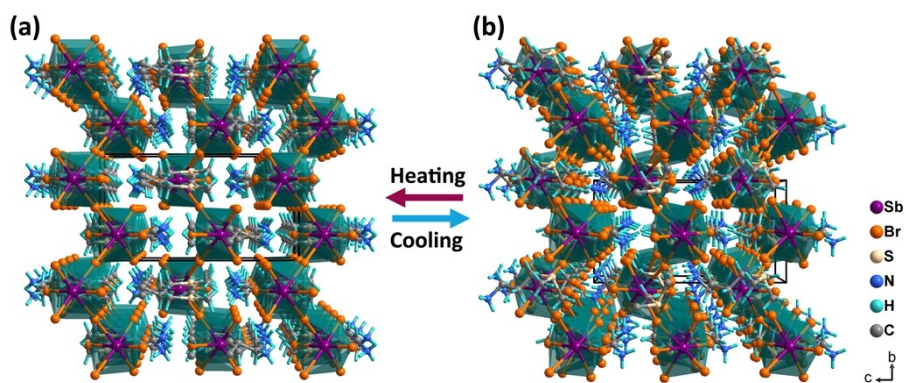

**Fig. S4** The packing diagrams of **1** at 303 K (a) and 100 K (b).

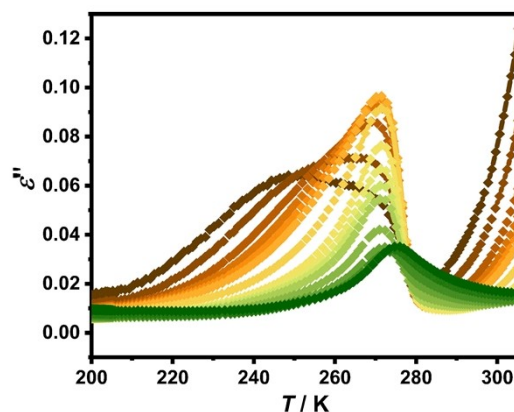

**Fig. S5** The imaginary part of the dielectric properties ( $\epsilon''$ ) of **1** at various frequencies from 1 kHz (dark red) to 1000 kHz (green) in cooling process.

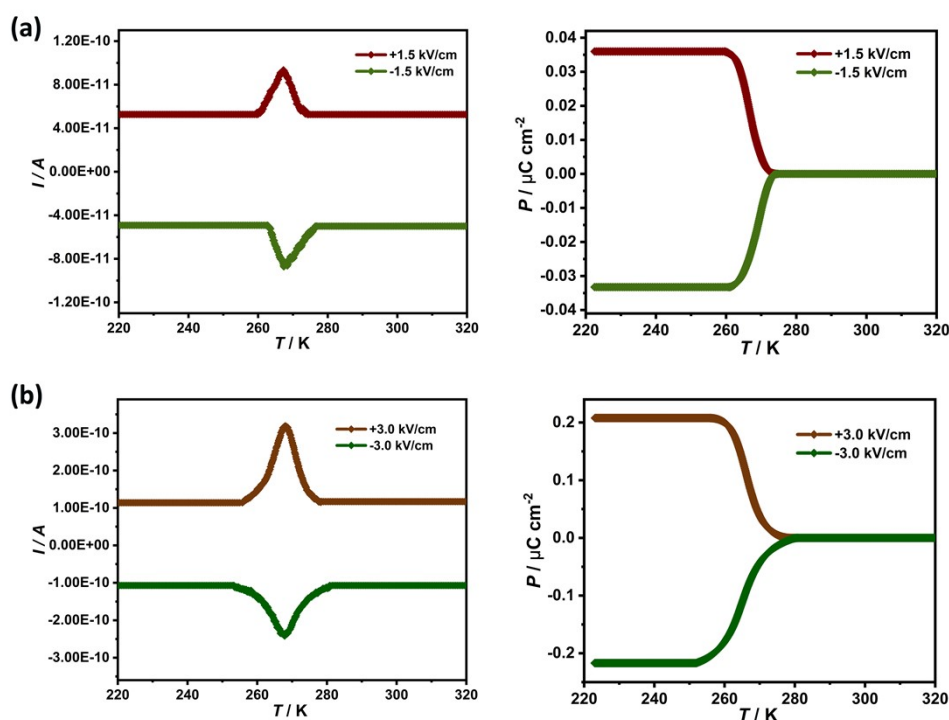

**Fig. S6** The temperature dependent pyroelectric current and spontaneous polarization of **1** at different poled voltages of about  $\pm 1.5 \text{ kV cm}^{-1}$  (a) and  $3.0 \text{ kV cm}^{-1}$  (b), respectively. By integrating the pyroelectric current with respect to time, spontaneous polarizations ( $P$ ) of about  $0.036 \mu\text{C cm}^{-2}$  (a) and  $0.21 \mu\text{C cm}^{-2}$  (b) were obtained.

## Reference

1. W. Kohn and L. J. Sham, *Phys. Rev.*, 1965, **140**, A1133.
2. W. Jia, J. Fu, Z. Cao, L. Wang, X. Chi, W. Gao, and L. W. Wang, *J. Comput. Phys.*, 2013, **251**, 102.
3. A. V. Krukau, O. A. Vydrov, A. F. Izmaylov and G. E. Scuseria, *J. Chem. Phys.*, 2006, **125**.
4. J. P. Perdew, K. Burke, and M. Ernzerhof, *Phys. Rev. Lett.* 1996, **77**, 3865.
5. P. Ziesche, S. Kurth, and J. P. Perdew, *Comput. Mater. Sci.*, 1998, **11**, 122.
6. H. J. Monkhorst and J. D. Pack, *Phys. Rev. B*, 1976, **13**, 5188.
